# Supplementary material for: Contrasting reactivity behaviour of the [RuHCl(CO)(PNP)] complex with electrophilic reagents XOTf (X = H, CH3, Me3Si)
Source: Royal Society of Chemistry journal article supplement (doi:10.1039/c4dt01570c), 2014-07-29
Supplement: c4dt01570c1.pdf [file c4dt01570c1.pdf]

## Electronic Supplementary Information (ESI)

### Contrasting reactivity behaviour of [RuHCl(CO)(PNP)] complex with electrophilic reagents XOTf (X = H, CH<sub>3</sub>, Me<sub>3</sub>Si)

A. Ramaraj,<sup>a</sup> Munirathinam Nethaji<sup>a</sup> and Balaji R. Jagirdar<sup>\*a</sup>

<sup>a</sup> Department of Inorganic & Physical Chemistry, Indian Institute of Science, Bangalore 560012, India

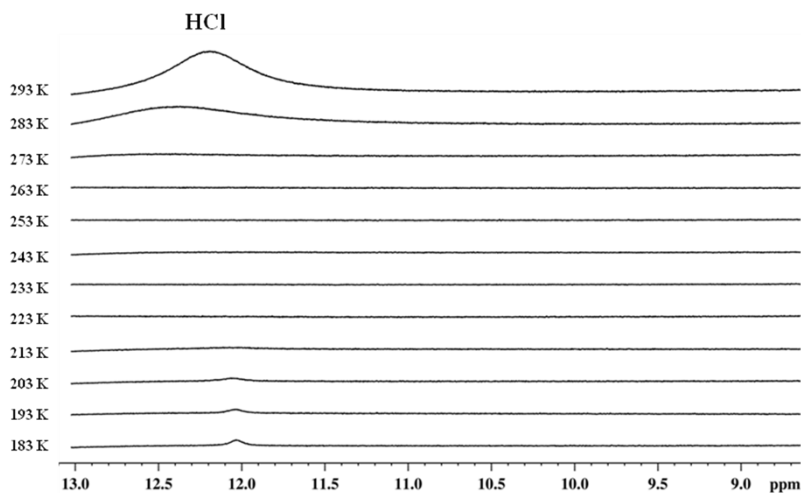

**Fig. S1.** VT <sup>1</sup>H NMR spectral stack plot of the reaction of complex **1** with HOTf in CD<sub>2</sub>Cl<sub>2</sub>. The downfield region shows the formation of HCl

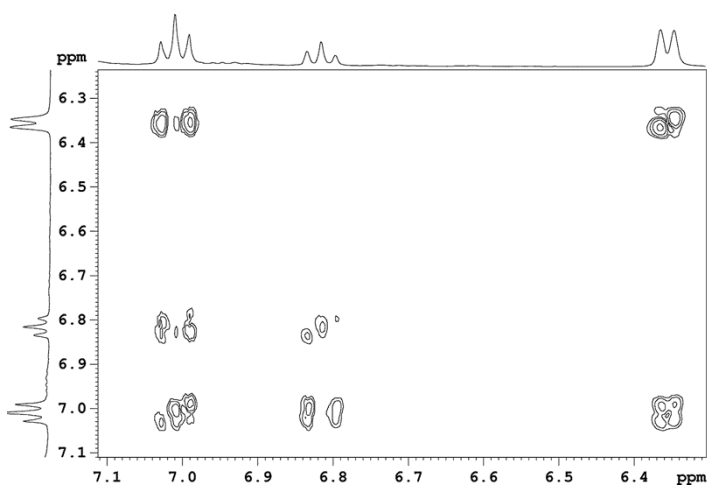

**Fig. S2.** Partial <sup>1</sup>H-<sup>1</sup>H COSY NMR spectrum of complex [RuH(CO)(PNP)][BAR<sub>4</sub><sup>f</sup>] (**5a**) in CD<sub>2</sub>Cl<sub>2</sub> at room temperature

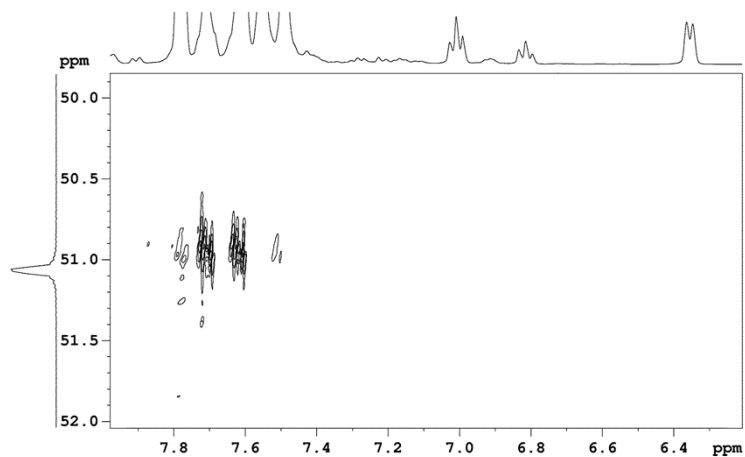

**Fig. S3.** Partial  $^1\text{H}$ - $^{31}\text{P}$  HMQC NMR spectrum of complex  $[\text{RuH}(\text{CO})(\text{PNP})][\text{BAR}_4^{\text{f}}]$  (**5a**) in  $\text{CD}_2\text{Cl}_2$  at room temperature

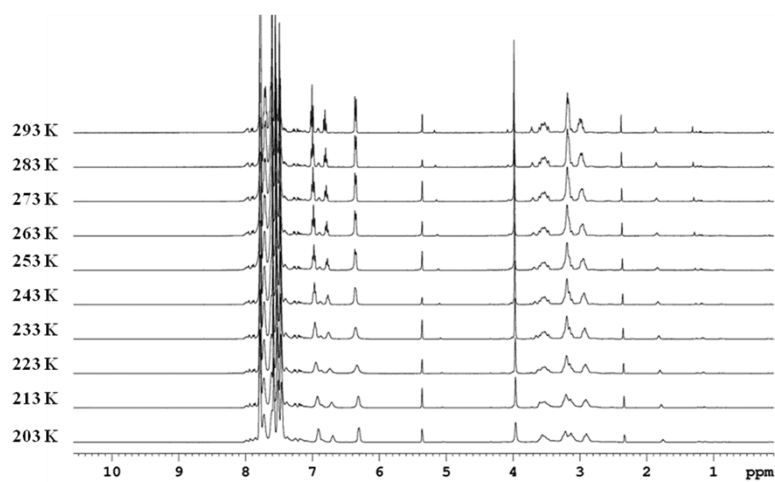

**Fig. S4.** Partial VT  $^1\text{H}$  NMR spectrum of complex  $[\text{RuH}(\text{CO})(\text{PNP})][\text{BAR}_4^{\text{f}}]$  (**5a**) in  $\text{CD}_2\text{Cl}_2$

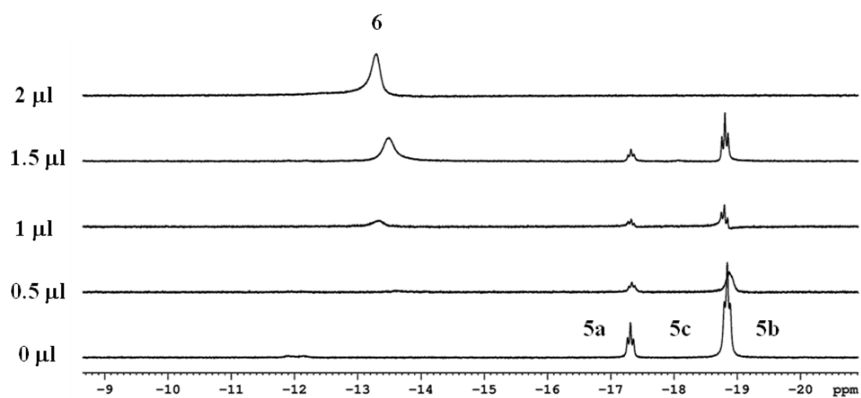

**Fig S5:** Partial <sup>1</sup>H NMR stack plot of the titration of **5a**, **5b** and **5c** with CH<sub>3</sub>CN in CD<sub>2</sub>Cl<sub>2</sub>. The volume of added CH<sub>3</sub>CN is given in the left hand side of the plot. NMR spectra were recorded at 213 K.
